## Correction

# Correction: Monte-Carlo Modeling of the Central Carbon Metabolism of *Lactococcus lactis*: Insights into Metabolic Regulation

The PLOS ONE Staff

## Notice of Republication

This article was republished on November 19th, 2014, due to Figure 3 being erroneously published as a duplicate of Figure 7. The publisher apologizes for this error. Please download the PDF again to view the corrected article. The originally published, uncorrected article and the republished, corrected article are provided here for reference.

## Supporting Information

**File S1.** Originally published, uncorrected article (PDF)

**File S2.** Republished, corrected article (PDF)

## Reference

1. Murabito E, Verma M, Bekker M, Bellomo D, Westerhoff HV, et al. (2014) Monte-Carlo Modeling of the Central Carbon Metabolism of *Lactococcus lactis*: Insights into Metabolic Regulation. PLoS ONE 9(9): e106453. doi:10.1371/journal.pone.0106453

**Citation:** The PLOS ONE Staff (2014) Correction: Monte-Carlo Modeling of the Central Carbon Metabolism of *Lactococcus lactis*: Insights into Metabolic Regulation. PLoS ONE 9(12): e116129. doi:10.1371/journal.pone.0116129

**Published:** December 19, 2014

**Copyright:** © 2014 The PLOS ONE Staff. This is an open-access article distributed under the terms of the Creative Commons Attribution License, which permits unrestricted use, distribution, and reproduction in any medium, provided the original author and source are credited.
